# Supplementary material
Source: Elsevier journal article supplement (https://www.sciencedirect.com/science/article/pii/S1885585725002026)
Supplement: mmc1 [file mmc1.pdf]

## SUPPLEMENTARY DATA

**Table 1 of the supplementary data.** Independent predictors for clinical outcomes at 2 years

|                                            | Hazard ratio | 95%CI     | P     |
|--------------------------------------------|--------------|-----------|-------|
| <i>Major adverse cardiovascular events</i> |              |           |       |
| DCB-based PCI                              | 0.27         | 0.17-0.44 | <.001 |
| Age                                        | 1.02         | 1.00-1.04 | .034  |
| Male sex                                   | 1.22         | 0.74-2.02 | .441  |
| Diabetes mellitus                          | 0.95         | 0.63-1.44 | .804  |
| Prior PCI                                  | 1.13         | 0.72-1.77 | .586  |
| End-stage renal disease                    | 2.64         | 1.22-5.67 | .013  |
| AMI presentation                           | 0.90         | 0.55-1.48 | .685  |
| Left ventricular ejection fraction         | 0.98         | 0.96-1.00 | .052  |
| LM or LAD target lesion                    | 1.34         | 0.89-2.03 | .165  |
| 3-vessel disease                           | 0.75         | 0.41-1.36 | .341  |
| <i>Target vessel revascularization</i>     |              |           |       |
| DCB-based PCI                              | 0.30         | 0.17-0.53 | <.001 |
| Age                                        | 1.00         | 0.97-1.02 | .745  |
| Male sex                                   | 1.01         | 0.55-1.86 | .974  |
| Diabetes mellitus                          | 1.05         | 0.62-1.76 | .860  |
| Prior PCI                                  | 1.18         | 0.67-2.06 | .571  |
| End-stage renal disease                    | 2.62         | 1.00-6.82 | .049  |
| AMI presentation                           | 0.81         | 0.42-1.58 | .539  |

|                                    |      |            |      |
|------------------------------------|------|------------|------|
| Left ventricular ejection fraction | 1.00 | 0.97-1.03  | .887 |
| LM or LAD target lesion            | 1.56 | 0.91-2.65  | .103 |
| 3-vessel disease                   | 0.38 | 0.14-1.06  | .066 |
| <i>Major bleeding</i>              |      |            |      |
| DCB-based PCI                      | 0.18 | 0.05-0.62  | .007 |
| Age                                | 1.05 | 1.01-1.10  | .025 |
| Male sex                           | 1.24 | 0.40-3.89  | .713 |
| Diabetes mellitus                  | 1.19 | 0.47-3.02  | .715 |
| Prior PCI                          | 1.10 | 0.40-3.00  | .854 |
| End-stage renal disease            | 2.93 | 0.63-13.60 | .171 |
| AMI presentation                   | 1.43 | 0.52-3.95  | .486 |
| Left ventricular ejection fraction | 0.98 | 0.94-1.03  | .450 |
| LM or LAD target lesion            | 0.52 | 0.20-1.35  | .180 |
| 3-vessel disease                   | 0.42 | 0.09-1.93  | .267 |

AMI, acute myocardial infarction; CI, confidence interval; DCB, drug-coated balloon; DES, drug-eluting stent; LAD, left anterior descending artery; LM, left main; PCI, percutaneous coronary intervention.

Hazard ratios and their 95% confidence intervals were calculated using multivariable Cox regression analysis.

Major adverse cardiovascular events were composed of cardiac death, myocardial infarction, stent or target lesion thrombosis, target vessel revascularization, and major bleeding (Bleeding Academic Research Consortium bleeding type 3 or greater).

.

**Table 2 of the supplementary data.** Comparison of clinical outcomes according to device diameter

|                                 | Device diameter ≤ 2.5 mm      |                           |                   |          | Device diameter > 2.5 mm      |                           |                  |          | <i>P</i> for interaction |
|---------------------------------|-------------------------------|---------------------------|-------------------|----------|-------------------------------|---------------------------|------------------|----------|--------------------------|
|                                 | DCB-based<br>PCI<br>(n = 181) | DES-only PCI<br>(n = 217) | 2-year outcomes   |          | DCB-based<br>PCI<br>(n = 442) | DES-only PCI<br>(n = 406) | 2-year outcomes  |          |                          |
|                                 |                               |                           | HR (95%CI)        | <i>P</i> |                               |                           | HR (95%CI)       | <i>P</i> |                          |
| MACE                            | 4 (3.0)                       | 33 (20.4)                 | 0.13 (0.04-0.35)  | < .001   | 18 (5.3)                      | 41 (11.8)                 | 0.41 (0.23-0.71) | .001     | .060                     |
| Cardiac death                   | 1 (0.6)                       | 4 (3.0)                   | 0.26 (0.03-2.56)  | .248     | 2 (0.5)                       | 5 (1.5)                   | 0.38 (0.07-1.99) | .252     | .829                     |
| Myocardial infarction           | 4 (3.0)                       | 2 (1.0)                   | 2.24 (0.44-11.47) | .334     | 4 (1.5)                       | 4 (1.6)                   | 0.95 (0.24-3.83) | .943     | .506                     |
| Target lesion thrombosis        | 1 (0.6)                       | 0                         | —                 | —        | 0                             | 5 (1.3)                   | —                | —        | —                        |
| Target vessel revascularization | 1 (0.6)                       | 24 (15.6)                 | 0.04 (0.01-0.33)  | .002     | 14 (4.1)                      | 23 (7.0)                  | 0.58 (0.29-1.12) | .106     | .018                     |
| Major bleeding                  | 0                             | 6 (2.9)                   | —                 | —        | 3 (1.1)                       | 10 (2.5)                  | 0.28 (0.08-1.03) | .055     | —                        |

CI, confidence interval; DCB, drug-coated balloon; DES, drug-eluting stent; HR, hazard ratio; MACE, major adverse cardiovascular events; PCI, percutaneous coronary intervention.

Values are expressed as No. (%). The cumulative incidences of clinical outcomes are presented as Kaplan-Meier estimates.

Major adverse cardiovascular events (MACE) were a composite outcome of cardiac death, myocardial infarction, stent or target lesion thrombosis, target vessel revascularization, and major bleeding (Bleeding Academic Research Consortium bleeding type 3 or greater).

**Figure 1 of the supplementary data**

Group diagram indicating how the final population included in this study was identified-

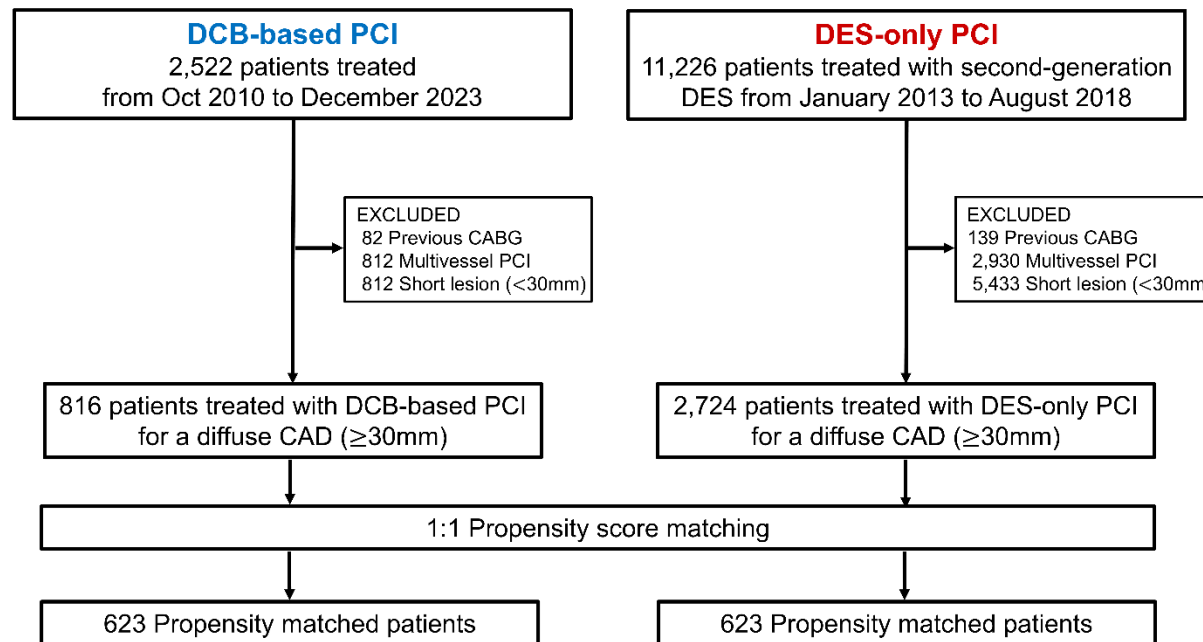

CABG, coronary artery bypass graft; CAD, coronary artery disease; DCB, drug-coated balloon; DES, drug-eluting stent; PCI, percutaneous coronary intervention.
